# Supplementary material for: Global transpiration data from sap flow measurements: the SAPFLUXNET database
Source: Copernicus journal article supplement (doi:10.5194/essd-13-2607-2021), 2021-06-14
Supplement: Supplementary file [file essd-13-2607-2021-supplement-title-page.pdf › essd-13-2607-2021-supplement-title-page.pdf]

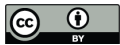

*Supplement of*

## **Global transpiration data from sap flow measurements: the SAPFLUXNET database**

**Rafael Poyatos et al.**

*Correspondence to:* Rafael Poyatos ([r.poyatos@creaf.uab.cat](mailto:r.poyatos@creaf.uab.cat))

- [essd-13-2607-2021-supplement-title-page.pdf](#)
- [QC\\_example\\_files.zip](#)
- [sapfluxnet\\_metadata\\_template.xlsx](#)
- [sfn\\_datapaper\\_supporting\\_R1\\_08032021.pdf](#)

The copyright of individual parts of the supplement might differ from the article licence.
